# Supplementary material for: Investigation of Prognostic Value of Claudin-5, PSMA, and Ki67 Expression in Canine Splenic Hemangiosarcoma
Source: MDPI journal article supplement (doi:10.3390/ani11082406), 2021-08-14
Supplement: s1 [file s1]

**Supplementary Table S1.** Identification and sequence of the primers used for qPCR.

| Expression Product | Gene ID   | Expression primer sequence (5' - 3')                              |
|--------------------|-----------|-------------------------------------------------------------------|
| <b>CLAUDIN-5</b>   | 100684266 | Forward: CCTTTGTGTTTCTGCTCTCTGA<br>Reverse: CCCAGTGTCTCCAGTGACTCA |
| <b>PSMA</b>        | 476775    | Forward: TCGATTGCACCCCACTGAT<br>Reverse: GGGCTTTGGAGCTCCTTTGT     |
| <b>ACTB</b>        | 487218    | Forward: TACAGCTTCACCACCACTGC<br>Reverse: CTTCTCCATGTCGTCCCAGT    |
| <b>GAHPD</b>       | 403755    | Forward: CATCAACGGGAAGTCCATCT<br>Reverse: TACTCACCACCAGCATCACC    |
| <b>HPRT</b>        | 442945    | Forward: CGGCTTGCTCGAGATGTGAT<br>Reverse: GCACACAGAGGGCTACGATGT   |
| <b>RPL8</b>        | 475130    | Forward: CCATGAATCCTGTGGAGC<br>Reverse: GTAGAGGGTTTGCCGATG        |
| <b>RPS19</b>       | 476450    | Forward: CCTTCCTCAAAAAGTCTGGG<br>Reverse: GTTCTCATCGTAGGGAGCAAG   |
| <b>RPS 5</b>       | 476366    | Forward: TCACTGGTGAGAACCCCCT<br>Reverse: CCTGATTCACACGGCGTAG      |

**Supplementary Table S2.** Specification of the immunohistochemistry protocol used in this research.

| Antibody         | Clone                                                                      | Peroxidase Blockage | Concentration | DAB  |
|------------------|----------------------------------------------------------------------------|---------------------|---------------|------|
| <b>Ki-67</b>     | Clone MIB-1(Dako Ominis, Santa Clara, CA)                                  | 1 hour              | 1: 50         | 5min |
| <b>CLAUDIN-5</b> | Monoclonal mouse anti-human antibodies (Zymed Inc, San Francisco, CA, USA) | 1 hour              | 1:200         | 1min |
| <b>PSMA</b>      | Anti-human mouse (Novus Biological, Littleton, CO)                         | 30 min              | 1:2000        | 1min |

**PSMA**= Prostatic specific membrane antigen.
